# Supplementary material
Source: Springer Nature journal article supplement (https://www.springermedizin.de/resource/supplementary/12907_2012_110_MOESM1_ESM.pdf/9524666)
Supplement: MOESM1 [file 9524666]

## Spoligopatterns

SIT

HIV

INH

RIF

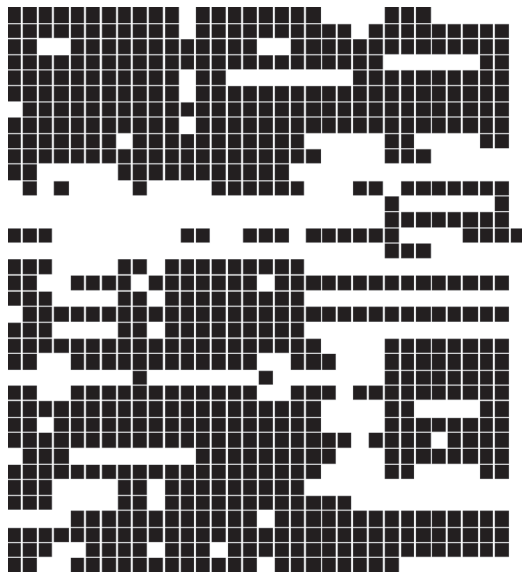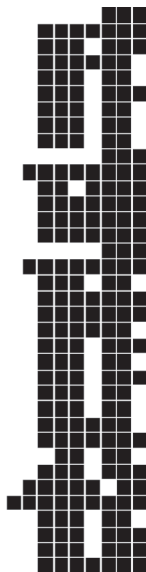

|      |     |    |    |
|------|-----|----|----|
| NA   | NEG | S  | S  |
| NA   | NEG | S  | S  |
| NA   | POS | S  | S  |
| NA   | NEG | S  | S  |
| NA   | POS | S  | S  |
| 73   | POS | S  | S  |
| 853  | NEG | R  | R  |
| NA   | NEG | R  | R  |
| NA   | POS | S  | S  |
| NA   | POS | S  | S  |
| NA   | NEG | R  | R  |
| NA   | NEG | S  | S  |
| 1238 | POS | S  | S  |
| 4    | NEG | ND | ND |
| NA   | NEG | R  | R  |
| NA   | POS | S  | S  |
| 21   | HCC | G  | G  |
| NA   | POS | S  | S  |
| NA   | POS | S  | S  |
| 7    | NEG | S  | S  |
| NA   | POS | S  | S  |
| 60   | POG | G  | G  |
| NA   | NEG | S  | S  |
| NA   | NEG | R  | R  |
| NA   | POS | R  | R  |
| NA   | NEG | S  | S  |
| NA   | POG | G  | G  |
| NA   | POS | S  | S  |
| NA   | POS | S  | S  |
| 815  | POS | ND | ND |
| NA   | POS | S  | S  |
| 061  | NEG | ND | ND |
| NA   | POS | R  | R  |
| NA   | NEG | ND | ND |
| NA   | POS | R  | R  |
| NA   | NEG | S  | S  |
